# Supplementary material
Source: PubMed Central journal article supplement (PMC5825232)
Supplement: NIHMS940152-supplement-appendix.pdf [file NIHMS940152-supplement-appendix.pdf]

**Comparison of Readmission Rates following Acute Myocardial Infarction in 3 Patient Age  
Groups (18-44, 45-64, and ≥65 years) in the USA**

Rohan Khera MD, Snigdha Jain MD, Ambarish Pandey MD, Vijay Agusala BS, Dharam J  
Kumbhani MD SM, Sandeep Das MD MPH, Jarett D Berry MD MS, James de Lemos MD,

Saket Girotra MD, SM

**Online Appendix**

eTable 1: Participating states in the National Readmission Database (NRD).

**Participating states**

|               |                |           |
|---------------|----------------|-----------|
| Arkansas      | Nevada         | Wisconsin |
| California    | New Mexico     |           |
| Florida       | New York       |           |
| Georgia       | South Carolina |           |
| Hawaii        | South Dakota   |           |
| Iowa          | Tennessee      |           |
| Louisiana     | Utah           |           |
| Massachusetts | Vermont        |           |
| Missouri      | Virginia       |           |
| Nebraska      | Washington     |           |

eTable 2: Participating states in the National Readmission Database (NRD).

| <b>Variable</b>                             | <b>Claim codes</b>                                                                                                |
|---------------------------------------------|-------------------------------------------------------------------------------------------------------------------|
| Acute myocardial infarction                 | 410.x0 or 410.x1                                                                                                  |
| Heart failure                               | CCS code 108                                                                                                      |
| Chronic atherosclerosis                     | CCS code 101                                                                                                      |
| Cardiac arrhythmia                          | CCS code 106                                                                                                      |
| Valvular Disease                            | CCS code 96                                                                                                       |
| Stroke/transient ischemic attack            | CCS codes 109, 112                                                                                                |
| Cerebrovascular Disease                     | CCS codes 110, 111, 113                                                                                           |
| Paralysis                                   | CCS code 82                                                                                                       |
| Peripheral Vascular Disease                 | CCS codes 114-117                                                                                                 |
| Diabetes Mellitus                           | CCS codes 49-50                                                                                                   |
| Acute Kidney Injury                         | CCS code 157                                                                                                      |
| End State Renal Disease/Hemodialysis        | CCS codes 58, 91, ICD-9 code 585.6                                                                                |
| Chronic Kidney Disease                      | CCS code 158                                                                                                      |
| Chronic obstructive pulmonary disease       | CCS code 127                                                                                                      |
| Pneumonia                                   | CCS code 122                                                                                                      |
| Asthma                                      | CCS code 128                                                                                                      |
| Fluid/Electrolyte Disorder                  | CCS code                                                                                                          |
| Sepsis                                      | CCS code 2                                                                                                        |
| Solid Malignancy                            | CCS codes 11-38, 40, 41, 43                                                                                       |
| Leukemia/Metastatic Malignancy              | CCS codes 39, 42                                                                                                  |
| Anemia                                      | CCS codes 59-61                                                                                                   |
| Chronic Skin Ulcer                          | CCS code 199                                                                                                      |
| Delirium/Dementia                           | CCS code 653                                                                                                      |
| Malnutrition                                | CCS code 52                                                                                                       |
| Anterior ST-elevation myocardial infarction | ICD-9 codes 410.00, 410.01, 410.10, 410.11                                                                        |
| Other ST-elevation myocardial infarction    | ICD-9 codes 410.20, 410.21, 410.3, 410.30, 410.31, 410.40, 410.41, 410.50, 410.51, 410.60, 410.61, 410.80, 410.81 |
| Prior myocardial infarction                 | ICD-9 code 412                                                                                                    |
| Prior percutaneous coronary intervention    | ICD-9 code V45.82                                                                                                 |
| Prior coronary artery bypass grafting       | ICD-9 code V45.81                                                                                                 |

eTable 3: Gender differences in characteristics of patients discharged alive after an acute myocardial infarction, overall- and by age-groups. Values are percentages, unless otherwise specified.

| Characteristics                             | Ages (years)     |                  |         |                |               |         |                  |                 |         |                  |                  |         |
|---------------------------------------------|------------------|------------------|---------|----------------|---------------|---------|------------------|-----------------|---------|------------------|------------------|---------|
|                                             | Overall          |                  |         | 18-44          |               |         | 45-64            |                 |         | ≥65              |                  |         |
|                                             | Men              | Women            | P-value | Men            | Women         | P-value | Men              | Women           | P-value | Men              | Women            | P-value |
| Number of events<br>(weighted numbers ± SD) | 296944<br>(7511) | 181303<br>(4334) | N/A     | 19150<br>(548) | 7367<br>(253) | N/A     | 130944<br>(3427) | 52760<br>(1448) | N/A     | 146850<br>(3854) | 121177<br>(2885) | N/A     |
| Patient characteristics                     |                  |                  |         |                |               |         |                  |                 |         |                  |                  |         |
| Income quartiles <sup>§</sup>               |                  |                  | <.0001  |                |               | <.0001  |                  |                 | <.0001  |                  |                  | <.0001  |
| Q1 (lowest)                                 | 27.8 (0.9)       | 30.6 (0.9)       |         | 30.9 (1.1)     | 39.6 (1.4)    |         | 28.5 (1.0)       | 24.4 (1.1)      |         | 26.9 (1.0)       | 28.5 (0.9)       |         |
| Q2                                          | 28.2 (0.6)       | 28.6 (0.6)       |         | 28.3 (0.8)     | 28.5 (1.0)    |         | 28.2 (0.7)       | 29.3 (0.7)      |         | 28.2 (0.7)       | 28.3 (0.7)       |         |
| Q3                                          | 24.5 (0.6)       | 23.2 (0.6)       |         | 24.2 (0.8)     | 19.0 (0.9)    |         | 24.3 (0.6)       | 22.2 (0.7)      |         | 24.6 (0.6)       | 23.9 (0.6)       |         |
| Q4 (highest)                                | 19.5 (0.9)       | 17.6 (0.8)       |         | 16.6 (0.9)     | 13.0 (0.9)    |         | 19.0 (0.9)       | 14.1 (0.8)      |         | 20.3 (0.9)       | 19.4 (0.8)       |         |
| Secondary diagnoses/comorbidities           |                  |                  |         |                |               |         |                  |                 |         |                  |                  |         |
| Heart failure                               | 26.9 (0.3)       | 35.3 (0.3)       | <.0001  | 12.5 (0.5)     | 15.1 (0.8)    | .0005   | 18.2 (0.4)       | 22.0 (0.4)      | <.0001  | 36.5 (0.4)       | 42.3 (0.4)       | <.0001  |
| Diabetes Mellitus                           | 39.0 (0.3)       | 42.1 (0.3)       | <.0001  | 27.2 (0.6)     | 36.6 (1.0)    | <.0001  | 36.7 (0.3)       | 45.1 (0.5)      | <.0001  | 42.6 (0.3)       | 41.1 (0.3)       | <.0001  |
| Coronary Artery Disease                     | 88.3 (0.3)       | 78.4 (0.4)       | <.0001  | 82.6 (0.5)     | 76.1 (0.9)    | <.0001  | 89.2 (0.3)       | 82.3 (0.4)      | <.0001  | 88.2 (0.3)       | 76.9 (0.4)       | <.0001  |
| Valvular heart disease                      | 11.7 (0.2)       | 17.6 (0.3)       | <.0001  | 3.9 (0.3)      | 6.7 (0.5)     | <.0001  | 6.6 (0.2)        | 9.5 (0.3)       | <.0001  | 17.4 (0.3)       | 21.7 (0.4)       | <.0001  |
| Peripheral Artery Disease                   | 22.5 (0.3)       | 26.5 (0.3)       | <.0001  | 9.2 (0.4)      | 13.8 (0.7)    | <.0001  | 16.7 (0.3)       | 21.5 (0.4)      | <.0001  | 29.5 (0.4)       | 29.5 (0.4)       | .9693   |
| Cerebrovascular Disease                     | 4.6 (0.1)        | 5.9 (0.1)        | <.0001  | 0.7 (0.1)      | 1.2 (0.2)     | .0130   | 2.7 (0.1)        | 4.0 (0.2)       | <.0001  | 6.7 (0.2)        | 7.1 (0.1)        | .0469   |
| Acute stroke/transient<br>ischemic attack   | 1.2 (0.04)       | 1.8 (0.05)       | <.0001  | 0.7 (0.1)      | 0.8 (0.2)     | .7249   | 0.9 (0.04)       | 1.3 (0.1)       | <.0001  | 1.5 (0.1)        | 2.1 (0.1)        | <.0001  |
| Cardiac arrhythmia                          | 30.4 (0.3)       | 30.3 (0.3)       | .6684   | 17.7 (0.6)     | 14.8 (0.7)    | .0012   | 23.2 (0.4)       | 18.6 (0.4)      | <.0001  | 38.5 (0.3)       | 36.3 (0.3)       | <.0001  |
| Liver disease                               | 3.6 (0.1)        | 3.6 (0.1)        | .8843   | 4.0 (0.2)      | 3.8 (0.4)     | .7230   | 3.8 (0.1)        | 3.8 (0.2)       | .9979   | 3.4 (0.1)        | 3.5 (0.1)        | .4485   |
| Asthma                                      | 3.5 (0.1)        | 7.3 (0.1)        | <.0001  | 3.9 (0.3)      | 10.0 (0.6)    | <.0001  | 3.6 (0.1)        | 8.9 (0.3)       | <.0001  | 3.4 (0.1)        | 6.4 (0.1)        | <.0001  |
| Chronic obstructive<br>pulmonary disease    | 15.1 (0.2)       | 17.6 (0.2)       | <.0001  | 3.3 (0.2)      | 5.2 (0.4)     | <.0001  | 11.6 (0.3)       | 16.0 (0.4)      | <.0001  | 19.7 (0.3)       | 19.0 (0.3)       | .0179   |
| Pneumonia                                   | 5.9 (0.1)        | 7.4 (0.1)        | <.0001  | 2.0 (0.2)      | 3.0 (0.3)     | .0032   | 3.5 (1.0)        | 4.7 (0.2)       | <.0001  | 8.6 (0.2)        | 8.8 (0.2)        | .2035   |
| Sepsis                                      | 1.5 (0.05)       | 1.8 (0.06)       | <.0001  | 0.8 (0.1)      | 1.0 (0.2)     | .2987   | 1.1 (0.1)        | 1.4 (0.1)       | .0024   | 2.0 (0.1)        | 2.0 (0.1)        | .6694   |
| Solid Malignancy                            | 10.0 (0.2)       | 10.9 (0.2)       | <.0001  | 1.6 (0.2)      | 2.7 (0.4)     | .0008   | 4.4 (0.1)        | 6.6 (0.2)       | <.0001  | 16.0 (0.3)       | 13.3 (0.2)       | <.0001  |
| Leukemia/Metastatic<br>Malignancy           | 1.2 (0.04)       | 1.2 (0.04)       | .1927   | 0.3 (0.1)      | 0.2 (0.1)     | .5645   | 0.6 (0.04)       | 0.8 (0.1)       | .0050   | 1.9 (0.1)        | 1.4 (0.1)        | <.0001  |
| Chronic Skin Ulcer                          | 1.6 (0.05)       | 2.3 (0.1)        | <.0001  | 0.5 (0.1)      | 0.9 (0.2)     | .0370   | 1.1 (0.1)        | 1.3 (0.1)       | .0230   | 2.3 (0.1)        | 2.8 (0.1)        | <.0001  |
| Delirium & Dementia                         | 4.6 (0.1)        | 9.9 (0.2)        | <.0001  | 0.2 (0.1)      | 0.1 (0.1)     | .3733   | 0.6 (0.04)       | 0.7 (0.1)       | .0662   | 8.7 (0.2)        | 14.5 (0.2)       | <.0001  |

|                                             |            |            |        |            |            |        |            |            |        |            |            |        |
|---------------------------------------------|------------|------------|--------|------------|------------|--------|------------|------------|--------|------------|------------|--------|
| Anemia                                      | 19.0 (0.3) | 26.5 (0.4) | <.0001 | 7.7 (0.4)  | 18.9 (0.9) | <.0001 | 13.1 (0.3) | 20.0 (0.5) | <.0001 | 25.7 (0.4) | 29.8 (0.4) | <.0001 |
| Malnutrition                                | 3.4 (0.1)  | 5.5 (0.2)  | <.0001 | 1.2 (0.2)  | 2.2 (0.3)  | .0004  | 2.0 (0.1)  | 3.5 (0.2)  | <.0001 | 4.9 (0.2)  | 6.7 (0.2)  | <.0001 |
| Paralysis                                   | 0.5 (0.02) | 0.6 (0.03) | .0664  | 0.6 (0.1)  | 0.2 (0.1)  | .0165  | 0.5 (0.03) | 0.5 (0.1)  | .6464  | 0.6 (0.03) | 0.7 (0.04) | .0679  |
| Acute Kidney Injury                         | 14.1 (0.2) | 15.0 (0.2) | <.0001 | 6.8 (0.4)  | 5.4 (0.4)  | .0160  | 8.9 (0.2)  | 9.5 (0.3)  | .0139  | 19.6 (0.3) | 18.0 (0.3) | <.0001 |
| End Stage Renal Disease/Hemodialysis        | 3.5 (0.1)  | 4.2 (0.1)  | <.0001 | 2.1 (0.2)  | 3.6 (0.4)  | .0001  | 3.0 (0.1)  | 5.2 (0.2)  | <.0001 | 4.2 (0.1)  | 3.8 (0.1)  | .0026  |
| Chronic kidney disease                      | 16.5 (0.2) | 18.2 (0.3) | <.0001 | 4.5 (0.3)  | 4.7 (0.4)  | .8062  | 7.9 (0.2)  | 8.5 (0.3)  | .0135  | 25.8 (0.3) | 23.2 (0.3) | <.0001 |
| Fluid/electrolyte disorder                  | 18.4 (0.3) | 25.8 (0.3) | <.0001 | 13.2 (0.5) | 19.9 (0.8) | <.0001 | 15.8 (0.3) | 21.3 (0.4) | <.0001 | 21.4 (0.3) | 28.1 (0.4) | <.0001 |
| <b>Past History</b>                         |            |            |        |            |            |        |            |            |        |            |            |        |
| Prior myocardial infarction                 | 13.7 (0.2) | 11.2 (0.2) | <.0001 | 9.7 (0.4)  | 8.0 (0.5)  | .0092  | 12.2 (0.2) | 10.4 (0.3) | <.0001 | 15.5 (0.3) | 11.7 (0.2) | <.0001 |
| Prior percutaneous coronary intervention    | 17.3 (0.3) | 13.6 (0.2) | <.0001 | 11.6 (0.5) | 9.2 (0.6)  | .0006  | 16.5 (0.3) | 13.9 (0.3) | <.0001 | 18.8 (0.3) | 13.7 (0.3) | <.0001 |
| Prior coronary artery bypass grafting       | 9.4 (0.2)  | 6.9 (0.1)  | <.0001 | 2.1 (0.2)  | 1.9 (0.3)  | .7173  | 5.2 (0.1)  | 5.0 (0.2)  | .1884  | 14.1 (0.2) | 8.1 (0.2)  | <.0001 |
| <b>AMI characteristics/complications</b>    |            |            |        |            |            |        |            |            |        |            |            |        |
| Anterior ST-elevation myocardial infarction | 11.5 (0.2) | 7.6 (0.1)  | <.0001 | 17.5 (0.5) | 12.4 (0.6) | <.0001 | 14.3 (0.2) | 8.9 (0.2)  | <.0001 | 8.2 (0.2)  | 6.8 (0.1)  | <.0001 |
| Non-Anterior AMI                            | 88.5 (0.2) | 92.4 (0.1) | <.0001 | 82.5 (0.5) | 87.6 (0.6) | <.0001 | 85.7 (0.2) | 91.1 (0.2) | <.0001 | 91.8 (0.2) | 93.2 (0.1) | <.0001 |
| Cardiogenic shock                           | 4.0 (0.1)  | 3.4 (0.1)  | <.0001 | 2.7 (0.2)  | 2.6 (0.3)  | .7923  | 4.0 (0.1)  | 3.7 (0.2)  | .0341  | 4.3 (0.1)  | 3.4 (0.1)  | <.0001 |
| Cardiac arrest                              | 3.9 (0.1)  | 2.4 (0.1)  | <.0001 | 4.6 (0.3)  | 3.9 (0.4)  | .1288  | 4.6 (0.1)  | 3.3 (0.1)  | <.0001 | 3.2 (0.1)  | 2.0 (0.1)  | <.0001 |
| <b>Procedures</b>                           |            |            |        |            |            |        |            |            |        |            |            |        |
| Percutaneous coronary intervention          | 58.0 (0.4) | 42.8 (0.5) | <.0001 | 70.6 (0.7) | 55.4 (1.2) | <.0001 | 67.9 (0.4) | 55.4 (0.5) | <.0001 | 47.6 (0.5) | 36.5 (0.5) | <.0001 |
| Coronary artery bypass grafting             | 10.9 (0.3) | 6.8 (0.2)  | <.0001 | 6.2 (0.3)  | 5.8 (0.5)  | .5150  | 11.6 (0.3) | 8.0 (0.3)  | <.0001 | 10.9 (0.3) | 6.3 (0.2)  | <.0001 |
| Mechanical ventilation                      | 6.0 (0.1)  | 6.4 (0.1)  | .0004  | 3.5 (0.2)  | 3.5 (0.4)  | .9412  | 5.4 (0.2)  | 5.8 (0.2)  | .0367  | 6.9 (0.2)  | 6.9 (0.2)  | .9770  |
| <b>Administrative/financial details</b>     |            |            |        |            |            |        |            |            |        |            |            |        |
| <u>Payment source</u>                       |            |            | <.0001 |            |            | <.0001 |            |            | <.0001 |            |            | <.0001 |
| Medicare                                    | 51.1 (0.4) | 69.1 (0.4) |        | 7.5 (0.4)  | 11.7 (0.7) |        | 15.6 (0.3) | 21.8 (0.4) |        | 88.5 (0.3) | 93.1 (0.3) |        |
| Medicaid                                    | 6.1 (0.2)  | 6.5 (0.2)  |        | 14.7 (0.6) | 26.6 (1.0) |        | 10.6 (0.4) | 16.0 (0.5) |        | 1.0 (0.1)  | 1.2 (0.1)  |        |
| Private insurance                           | 29.9 (0.4) | 17.3 (0.3) |        | 47.2 (0.7) | 37.5 (1.2) |        | 51.7 (0.6) | 43.0 (0.6) |        | 8.2 (0.3)  | 4.9 (0.2)  |        |
| Others                                      | 12.8 (0.3) | 7.1 (0.2)  |        | 30.6 (0.7) | 24.2 (1.1) |        | 22.1 (0.4) | 19.1 (0.4) |        | 2.3 (0.2)  | 0.9 (0.1)  |        |
| <u>Any insurance</u>                        | 87.0 (0.3) | 92.8 (0.2) | <.0001 | 69.3 (0.7) | 75.6 (1.1) | <.0001 | 77.8 (0.4) | 80.7 (0.4) | <.0001 | 97.6 (0.2) | 99.1 (0.1) | <.0001 |

| <u>30-day Readmission</u> |            |            |        |           |            |        |            |            |        |            |            |        |
|---------------------------|------------|------------|--------|-----------|------------|--------|------------|------------|--------|------------|------------|--------|
| All-cause, %              | 13.1 (0.2) | 16.8 (0.2) | <.0001 | 8.9 (0.4) | 12.0 (0.6) | <.0001 | 10.2 (0.2) | 13.9 (0.3) | <.0001 | 16.4 (0.2) | 18.4 (0.2) | <.0001 |
| Cardiac, %                | 7.7 (0.1)  | 9.3 (0.1)  | <.0001 | 6.0 (0.3) | 8.0 (0.5)  | .0008  | 6.4 (0.1)  | 7.8 (0.2)  | <.0001 | 9.0 (0.1)  | 10.0 (0.2) | <.0001 |
| Unplanned, %              | 10.0 (0.1) | 14.1 (0.2) | <.0001 | 6.5 (0.3) | 9.5 (0.6)  | <.0001 | 7.3 (0.2)  | 11.1 (0.3) | <.0001 | 12.9 (0.2) | 15.7 (0.2) | <.0001 |

eTable 4: Income-group differences in characteristics of patients discharged alive after an acute myocardial infarction, overall- and by age-group. Presented for lowest vs. highest income quartiles. P-value corresponds to trend across quartiles. Values are percentages, unless otherwise specified.

| Characteristics                             | Ages (years)     |                 |         |                 |                 |         |                 |                 |         |                 |                 |         |
|---------------------------------------------|------------------|-----------------|---------|-----------------|-----------------|---------|-----------------|-----------------|---------|-----------------|-----------------|---------|
|                                             | Overall          |                 |         | 18-44 years     |                 |         | 45-64 years     |                 |         | ≥65             |                 |         |
|                                             | Lowest           | Highest         | p-value | Lowest          | Highest         | p-value | Lowest          | Highest         | p-value | Lowest          | Highest         | p-value |
| Number of events<br>(weighted numbers ± SD) | 135963<br>(5683) | 88297<br>(4296) | N/A     | 8691<br>(398.1) | 4058<br>(229.4) | N/A     | 54477<br>(2383) | 31778<br>(1600) | N/A     | 72795<br>(3090) | 52461<br>(2596) | N/A     |
| Women                                       | 40.3 (0.3)       | 35.6 (0.4)      | <.0001  | 33.0 (0.8)      | 23.1 (1.1)      | <.0001  | 32.8 (0.4)      | 23.0 (0.4)      | <.0001  | 46.7 (0.5)      | 44.2 (0.5)      | <.0001  |
| <b>Secondary diagnoses/comorbidities</b>    |                  |                 |         |                 |                 |         |                 |                 |         |                 |                 |         |
| Heart failure                               | 31.7 (0.5)       | 29.5 (0.5)      | <.0001  | 16.3 (0.9)      | 9.3 (0.8)       | <.0001  | 22.5 (0.5)      | 15.4 (0.5)      | <.0001  | 40.4 (0.6)      | 39.6 (0.5)      | .0017   |
| Diabetes Mellitus                           | 42.9 (0.3)       | 37.0 (0.4)      | <.0001  | 31.6 (0.9)      | 25.3 (1.1)      | .0006   | 42.8 (0.4)      | 35.0 (0.6)      | <.0001  | 44.4 (0.4)      | 39.1 (0.5)      | <.0001  |
| Coronary Artery Disease                     | 84.7 (0.4)       | 84.3 (0.5)      | .8185   | 80.6 (0.8)      | 79.2 (1.1)      | .0690   | 86.8 (0.4)      | 87.1 (0.5)      | .2167   | 83.6 (0.5)      | 82.9 (0.6)      | .5242   |
| Valvular heart disease                      | 13.5 (0.4)       | 15.2 (0.4)      | .0004   | 5.3 (0.5)       | 3.7 (0.5)       | .0344   | 8.0 (0.3)       | 6.9 (0.3)       | .0056   | 18.5 (0.5)      | 21.2 (0.6)      | <.0001  |
| Peripheral Artery Disease                   | 24.7 (0.3)       | 23.5 (0.5)      | .0500   | 11.0 (0.6)      | 10.4 (0.8)      | .7757   | 19.9 (0.4)      | 14.8 (0.4)      | <.0001  | 30.0 (0.4)      | 29.9 (0.6)      | .2229   |
| Cerebrovascular Disease                     | 5.4 (0.1)        | 4.9 (0.2)       | .0063   | 1.0 (0.2)       | 0.5 (0.2)       | .1202   | 3.8 (0.2)       | 2.1 (0.1)       | <.0001  | 7.2 (0.2)       | 6.8 (0.2)       | .2432   |
| Acute stroke/transient<br>ischemic attack   | 1.5 (0.1)        | 1.4 (0.1)       | .0532   | 0.7 (0.1)       | 0.5 (0.2)       | .4584   | 1.2 (0.1)       | 0.9 (0.1)       | .0018   | 1.9 (0.1)       | 1.8 (0.1)       | .1275   |
| Cardiac arrhythmia                          | 28.8 (0.4)       | 32.7 (0.5)      | <.0001  | 15.7 (0.8)      | 19.1 (1.1)      | .0361   | 21.4 (0.4)      | 22.4 (0.5)      | .3311   | 35.9 (0.5)      | 40.0 (0.6)      | <.0001  |
| Liver disease                               | 3.8 (0.2)        | 3.7 (0.1)       | .1186   | 3.7 (0.3)       | 4.3 (0.5)       | .7855   | 4.0 (0.2)       | 3.6 (0.2)       | .2503   | 3.6 (0.2)       | 3.6 (0.2)       | .1172   |
| Asthma                                      | 5.1 (0.1)        | 5.2 (0.2)       | .0090   | 6.5 (0.4)       | 4.8 (0.5)       | .0183   | 5.5 (0.2)       | 5.0 (0.2)       | .0050   | 4.6 (0.2)       | 5.4 (0.2)       | .0006   |
| Chronic obstructive<br>pulmonary disease    | 19.0 (0.3)       | 11.7 (0.2)      | <.0001  | 5.0 (0.4)       | 1.9 (0.4)       | <.0001  | 16.8 (0.4)      | 6.7 (0.2)       | <.0001  | 22.4 (0.4)      | 15.4 (0.3)      | <.0001  |
| Pneumonia                                   | 6.9 (0.2)        | 6.1 (0.2)       | .0006   | 2.6 (0.3)       | 2.0 (0.3)       | .5035   | 4.7 (0.2)       | 2.8 (0.1)       | <.0001  | 9.1 (0.3)       | 8.4 (0.2)       | .1143   |
| Sepsis                                      | 1.7 (0.1)        | 1.7 (0.1)       | .0543   | 1.1 (0.2)       | 0.8 (0.2)       | .1001   | 1.3 (0.1)       | 1.2 (0.1)       | .3648   | 2.1 (0.1)       | 2.1 (0.1)       | .1827   |
| Solid Malignancy                            | 9.5 (0.2)        | 12.0 (0.3)      | <.0001  | 1.6 (0.2)       | 2.1 (0.4)       | .6344   | 5.1 (0.2)       | 5.4 (0.2)       | .2579   | 13.7 (0.3)      | 16.7 (0.4)      | <.0001  |
| Leukemia/Metastatic<br>Malignancy           | 1.1 (0.1)        | 1.4 (0.1)       | .0002   | 0.2 (0.1)       | 0.5 (0.2)       | .0803   | 0.7 (0.1)       | 0.6 (0.1)       | .3723   | 1.4 (0.1)       | 2.0 (0.1)       | .0001   |
| Chronic Skin Ulcer                          | 2.0 (0.1)        | 1.9 (0.1)       | .2743   | 0.6 (0.1)       | 0.4 (0.1)       | .3253   | 1.4 (0.1)       | 1.0 (0.1)       | .0081   | 2.6 (0.1)       | 2.6 (0.1)       | .1917   |
| Delirium & Dementia                         | 6.6 (0.2)        | 7.2 (0.2)       | .0049   | 0.3 (0.1)       | 0.1 (0.1)       | .3732   | 0.7 (0.1)       | 0.5 (0.1)       | .0410   | 11.8 (0.3)      | 11.8 (0.3)      | .0232   |
| Anemia                                      | 22.9 (0.4)       | 21.0 (0.5)      | .0004   | 12.3 (0.9)      | 8.2 (0.8)       | .0025   | 16.8 (0.5)      | 13.0 (0.5)      | <.0001  | 28.8 (0.5)      | 26.8 (0.6)      | .0014   |
| Malnutrition                                | 4.5 (0.2)        | 3.9 (0.2)       | .0410   | 1.5 (0.2)       | 1.3 (0.3)       | .9600   | 2.8 (0.2)       | 2.2 (0.2)       | .0009   | 6.1 (0.2)       | 5.2 (0.2)       | .0179   |
| Paralysis                                   | 0.6 (0.03)       | 0.6 (0.1)       | .3909   | 0.4 (0.1)       | N/A             | N/A     | 0.5 (0.05)      | 0.4 (0.1)       | .7034   | 0.6 (0.1)       | 0.7 (0.1)       | .0480   |
| Acute Kidney Injury                         | 15.3 (0.4)       | 14.3 (0.3)      | .0002   | 7.4 (0.5)       | 4.1 (0.5)       | .0004   | 10.7 (0.4)      | 7.5 (0.3)       | <.0001  | 19.6 (0.5)      | 19.1 (0.4)      | .0239   |
| End Stage Renal<br>Disease/Hemodialysis     | 4.5 (0.2)        | 3.5 (0.1)       | <.0001  | 2.7 (0.3)       | 2.7 (0.4)       | .6475   | 4.4 (0.2)       | 3.0 (0.2)       | <.0001  | 4.7 (0.2)       | 3.8 (0.2)       | <.0001  |

|                                             |            |            |        |            |            |        |            |            |        |            |            |        |
|---------------------------------------------|------------|------------|--------|------------|------------|--------|------------|------------|--------|------------|------------|--------|
| Chronic kidney disease                      | 17.5 (0.3) | 16.9 (0.3) | .5534  | 5.9 (0.6)  | 3.0 (0.4)  | <.0001 | 9.6 (0.3)  | 6.3 (0.3)  | <.0001 | 24.7 (0.5) | 24.4 (0.4) | .8793  |
| Fluid/electrolyte disorder                  | 22.2 (0.4) | 20.7 (0.4) | .0011  | 16.3 (0.9) | 14.0 (1.0) | .1396  | 19.0 (0.5) | 15.4 (0.5) | <.0001 | 25.3 (0.5) | 24.5 (0.5) | .0746  |
| <b>Past History</b>                         |            |            |        |            |            |        |            |            |        |            |            |        |
| Prior myocardial infarction                 | 12.9 (0.3) | 13.2 (0.3) | .1093  | 10.5 (0.7) | 7.1 (0.7)  | .0063  | 12.4 (0.3) | 10.7 (0.3) | .0008  | 13.6 (0.4) | 15.2 (0.4) | <.0001 |
| Prior percutaneous coronary intervention    | 16.3 (0.4) | 15.8 (0.3) | .1114  | 12.8 (0.7) | 8.4 (0.6)  | <.0001 | 17.0 (0.5) | 14.1 (0.4) | <.0001 | 16.2 (0.4) | 17.4 (0.4) | .0305  |
| Prior coronary artery bypass grafting       | 8.5 (0.2)  | 8.3 (0.2)  | .7910  | 2.2 (0.3)  | 1.1 (0.2)  | .0447  | 5.9 (0.2)  | 4.1 (0.2)  | <.0001 | 11.3 (0.3) | 11.4 (0.3) | .9462  |
| <b>AMI characteristics/complications</b>    |            |            |        |            |            |        |            |            |        |            |            |        |
| Anterior ST-elevation myocardial infarction | 9.2 (0.2)  | 10.9 (0.3) | <.0001 | 15.2 (0.7) | 16.9 (1.0) | .3141  | 11.2 (0.3) | 14.8 (0.4) | <.0001 | 7.0 (0.2)  | 8.1 (0.2)  | <.0001 |
| Non-Anterior AMI                            | 90.8 (0.2) | 89.1 (0.3) | <.0001 | 84.8 (0.7) | 83.1 (1.0) | .3141  | 88.8 (0.3) | 85.2 (0.4) | <.0001 | 93.1 (0.2) | 91.9 (0.2) | <.0001 |
| AntST-elevation myocardial infarction_dx1   | 9.0 (0.2)  | 10.7 (0.3) | <.0001 | 15.0 (0.7) | 16.6 (0.9) | .3378  | 11.0 (0.3) | 14.5 (0.4) | <.0001 | 6.8 (0.2)  | 7.9 (0.2)  | <.0001 |
| other_locationAMI_dx1                       | 14.7 (0.3) | 15.9 (0.4) | <.0001 | 20.0 (0.9) | 24.4 (1.1) | <.0001 | 19.1 (0.4) | 21.8 (0.5) | <.0001 | 10.7 (0.3) | 11.7 (0.3) | .0035  |
| Cardiogenic shock                           | 3.7 (0.1)  | 4.0 (0.2)  | .4410  | 2.8 (0.3)  | 2.5 (0.4)  | .9047  | 3.8 (0.2)  | 3.9 (0.2)  | .7533  | 3.7 (0.1)  | 4.1 (0.2)  | .1814  |
| Cardiac arrest                              | 3.2 (0.1)  | 3.6 (0.1)  | .0054  | 4.8 (0.4)  | 4.4 (0.5)  | .6534  | 3.9 (0.1)  | 4.8 (0.2)  | .0019  | 2.5 (0.1)  | 2.8 (0.1)  | .0760  |
| <b>Procedures</b>                           |            |            |        |            |            |        |            |            |        |            |            |        |
| Percutaneous coronary intervention          | 50.7 (0.7) | 52.4 (0.7) | .0005  | 63.2 (1.1) | 68.1 (1.3) | <.0001 | 60.8 (0.7) | 67.8 (0.7) | <.0001 | 41.5 (0.8) | 41.9 (0.8) | .0590  |
| Coronary artery bypass grafting             | 9.3 (0.3)  | 9.1 (0.5)  | .7431  | 5.9 (0.5)  | 5.0 (0.6)  | .0528  | 10.5 (0.4) | 10.1 (0.5) | .6584  | 8.8 (0.3)  | 8.7 (0.5)  | .9867  |
| Mechanical ventilation                      | 5.9 (0.2)  | 6.8 (0.3)  | .0012  | 4.2 (0.4)  | 3.2 (0.5)  | .1151  | 5.4 (0.2)  | 5.6 (0.3)  | .8432  | 6.5 (0.2)  | 7.9 (0.3)  | <.0001 |
| <b>Administrative/ financial details</b>    |            |            |        |            |            |        |            |            |        |            |            |        |
| <u>Payment source</u>                       |            |            | <.0001 |            |            | <.0001 |            |            | <.0001 |            |            | <.0001 |
| Medicare                                    | 59.2 (0.5) | 56.7 (0.6) |        | 10.6 (0.6) | 4.9 (0.6)  |        | 23.8 (0.4) | 9.6 (0.3)  |        | 91.4 (0.4) | 89.2 (0.4) |        |
| Medicaid                                    | 8.9 (0.3)  | 3.8 (0.2)  |        | 23.3 (0.9) | 10.6 (0.9) |        | 16.9 (0.6) | 7.7 (0.4)  |        | 1.3 (0.1)  | 1.0 (0.1)  |        |
| Private insurance                           | 18.4 (0.4) | 32.7 (0.5) |        | 29.6 (0.9) | 66.7 (1.4) |        | 34.1 (0.6) | 67.9 (0.6) |        | 5.3 (0.4)  | 8.7 (0.3)  |        |
| Others                                      | 13.5 (0.4) | 6.8 (0.2)  |        | 36.5 (1.1) | 17.8 (1.1) |        | 25.1 (0.6) | 14.9 (0.5) |        | 2.0 (0.2)  | 1.1 (0.1)  |        |
| <u>Any insurance</u>                        | 86.4 (0.4) | 93.1 (0.2) | <.0001 | 63.3 (1.1) | 82.2 (1.1) | <.0001 | 74.5 (0.6) | 85.0 (0.5) | <.0001 | 97.9 (0.2) | 98.9 (0.1) | <.0001 |
| <b>30-day Readmission</b>                   |            |            |        |            |            |        |            |            |        |            |            |        |



|              |            |            |        |            |           |       |            |           |        |            |            |       |
|--------------|------------|------------|--------|------------|-----------|-------|------------|-----------|--------|------------|------------|-------|
| All-cause, % | 15.6 (0.2) | 13.7 (0.3) | <.0001 | 11.3 (0.6) | 8.0 (0.8) | .0028 | 12.9 (0.3) | 9.1 (0.3) | <.0001 | 18.1 (0.3) | 17.0 (0.3) | .0023 |
| Cardiac, %   | 8.8 (0.2)  | 7.9 (0.2)  | <.0001 | 7.5 (0.6)  | 4.9 (0.6) | .0149 | 7.7 (0.2)  | 5.9 (0.2) | <.0001 | 9.8 (0.2)  | 9.4 (0.2)  | .1248 |
| Unplanned, % | 12.6 (0.2) | 10.8 (0.2) | <.0001 | 8.8 (0.5)  | 6.0 (0.7) | .0013 | 10.1 (0.3) | 6.4 (0.2) | <.0001 | 14.9 (0.3) | 13.8 (0.3) | .0055 |

**eTable 5: Revascularization-group differences in characteristics of patients discharged alive after an acute myocardial infarction, overall- and by age-group. Presented for lowest vs. highest income quartiles. P-value corresponds to trend across quartiles. Values are percentages, unless otherwise specified.**

| Characteristics                             | Ages (years)      |                  |         |                   |               |         |                   |                 |         |                   |                  |         |
|---------------------------------------------|-------------------|------------------|---------|-------------------|---------------|---------|-------------------|-----------------|---------|-------------------|------------------|---------|
|                                             | Overall           |                  |         | 18-44             |               |         | 45-64             |                 |         | ≥65               |                  |         |
|                                             | Revascularization |                  |         | Revascularization |               |         | Revascularization |                 |         | Revascularization |                  |         |
|                                             | Yes               | No               | p-value | Yes               | No            | p-value | Yes               | No              | p-value | Yes               | No               | p-value |
| Number of events<br>(weighted numbers ± SD) | 290178<br>(8446)  | 188069<br>(4036) |         | 18974<br>(586)    | 7543<br>(260) |         | 135333<br>(3874)  | 48371<br>(1191) |         | 135872<br>(4276)  | 132155<br>(2877) |         |
| <b>Income quartiles</b>                     |                   |                  | 0.0021  |                   |               | <.0001  |                   |                 | <.0001  |                   |                  | 0.1146  |
| Q1 (lowest)                                 | 28.2 (1.0)        | 30.0 (0.9)       |         | 31.8 (1.1)        | 37.2 (1.4)    |         | 28.8 (1.0)        | 34.1 (1.0)      |         | 27.1 (1.1)        | 28.1 (0.9)       |         |
| Q2                                          | 28.6 (0.7)        | 28.0 (0.6)       |         | 28.9 (0.9)        | 26.7 (1.1)    |         | 28.5 (0.7)        | 28.7 (0.7)      |         | 28.7 (0.7)        | 27.7 (0.6)       |         |
| Q3                                          | 24.4 (0.6)        | 23.3 (0.6)       |         | 23.6 (0.8)        | 20.7 (0.9)    |         | 24.4 (0.6)        | 21.7 (0.6)      |         | 24.6 (0.7)        | 24.0 (0.6)       |         |
| Q4 (highest)                                | 18.8 (0.9)        | 18.7 (0.8)       |         | 15.7 (0.9)        | 15.1 (1.0)    |         | 18.4 (0.9)        | 15.5 (0.7)      |         | 19.6 (1.0)        | 20.1 (0.8)       |         |
| Women                                       | 30.6 (0.2)        | 49.2 (0.2)       | <.0001  | 23.5 (0.6)        | 38.5 (1.0)    | <.0001  | 24.4 (0.2)        | 40.8 (0.4)      | <.0001  | 37.7 (0.3)        | 52.9 (0.3)       | <.0001  |
| <b>Secondary diagnoses/comorbidities</b>    |                   |                  |         |                   |               |         |                   |                 |         |                   |                  |         |
| Heart failure                               | 21.1 (0.3)        | 44.0 (0.3)       | <.0001  | 10.7 (0.5)        | 19.6 (1.0)    | <.0001  | 15.2 (0.3)        | 30.7 (0.5)      | <.0001  | 28.4 (0.4)        | 50.2 (0.3)       | <.0001  |
| Diabetes Mellitus                           | 39.1 (0.3)        | 41.8 (0.3)       | <.0001  | 30.7 (0.6)        | 27.7 (0.8)    | 0.0036  | 37.6 (0.3)        | 43.4 (0.5)      | <.0001  | 41.7 (0.4)        | 42.1 (0.3)       | 0.3681  |
| Coronary Artery Disease                     | 92.7 (0.2)        | 72.0 (0.3)       | <.0001  | 90.2 (0.5)        | 57.3 (1.0)    | <.0001  | 92.2 (0.3)        | 73.4 (0.5)      | <.0001  | 93.5 (0.2)        | 72.3 (0.4)       | <.0001  |
| Valvular heart disease                      | 10.4 (0.3)        | 19.4 (0.3)       | <.0001  | 3.7 (0.3)         | 7.1 (0.6)     | <.0001  | 6.4 (0.2)         | 10.4 (0.3)      | <.0001  | 15.3 (0.4)        | 23.5 (0.4)       | <.0001  |
| Peripheral Artery Disease                   | 21.0 (0.3)        | 28.7 (0.3)       | <.0001  | 10.0 (0.4)        | 11.7 (0.6)    | 0.0182  | 16.4 (0.3)        | 22.6 (0.4)      | <.0001  | 27.1 (0.4)        | 32.0 (0.4)       | <.0001  |
| Cerebrovascular Disease                     | 4.0 (0.1)         | 6.7 (0.1)        | <.0001  | 0.7 (0.1)         | 1.3 (0.2)     | 0.0044  | 2.6 (0.1)         | 4.2 (0.2)       | <.0001  | 5.9 (0.2)         | 7.9 (0.2)        | <.0001  |
| Acute stroke/transient<br>ischemic attack   | 1.1 (0.04)        | 1.9 (0.1)        | <.0001  | 0.7 (0.1)         | 0.9 (0.2)     | 0.2655  | 0.8 (0.04)        | 1.6 (0.1)       | <.0001  | 1.5 (0.1)         | 2.1 (0.1)        | <.0001  |
| Cardiac arrhythmia                          | 27.7 (0.4)        | 34.5 (0.3)       | <.0001  | 17.0 (0.5)        | 16.7 (0.8)    | 0.8237  | 21.7 (0.4)        | 22.4 (0.4)      | 0.0729  | 35.3 (0.4)        | 39.9 (0.3)       | <.0001  |
| Liver disease                               | 3.2 (0.1)         | 4.2 (0.1)        | <.0001  | 3.5 (0.2)         | 5.2 (0.4)     | 0.0001  | 3.3 (0.1)         | 5.0 (0.2)       | <.0001  | 3.0 (0.1)         | 3.8 (0.1)        | <.0001  |
| Asthma                                      | 4.6 (0.1)         | 5.5 (0.1)        | <.0001  | 4.8 (0.3)         | 7.7 (0.5)     | <.0001  | 4.5 (0.1)         | 6.6 (0.2)       | <.0001  | 4.6 (0.1)         | 4.9 (0.1)        | 0.0457  |
| Chronic obstructive<br>pulmonary disease    | 13.2 (0.2)        | 20.4 (0.2)       | <.0001  | 3.6 (0.2)         | 4.6 (0.4)     | 0.0131  | 11.2 (0.3)        | 17.7 (0.4)      | <.0001  | 16.6 (0.3)        | 22.2 (0.3)       | <.0001  |
| Pneumonia                                   | 4.1 (0.1)         | 10.1 (0.2)       | <.0001  | 1.7 (0.2)         | 3.7 (0.4)     | <.0001  | 3.0 (0.1)         | 6.3 (0.2)       | <.0001  | 5.6 (0.1)         | 11.8 (0.2)       | <.0001  |
| Sepsis                                      | 1.3 (0.05)        | 2.2 (0.1)        | <.0001  | 0.7 (0.1)         | 1.2 (0.2)     | 0.0042  | 1.0 (0.1)         | 1.9 (0.1)       | <.0001  | 1.6 (0.1)         | 2.3 (0.1)        | <.0001  |
| Solid Malignancy                            | 8.5 (0.2)         | 13.1 (0.2)       | <.0001  | 1.8 (0.2)         | 2.0 (0.3)     | 0.5661  | 4.5 (0.1)         | 6.6 (0.2)       | <.0001  | 13.5 (0.3)        | 16.1 (0.3)       | <.0001  |
| Leukemia/Metastatic<br>Malignancy           | 0.7 (0.03)        | 2.0 (0.1)        | <.0001  | 0.2 (0.1)         | 0.4 (0.1)     | 0.1454  | 0.4 (0.03)        | 1.3 (0.1)       | <.0001  | 1.0 (0.05)        | 2.3 (0.1)        | <.0001  |
| Chronic Skin Ulcer                          | 1.0 (0.04)        | 3.3 (0.1)        | <.0001  | 0.4 (0.1)         | 1.3 (0.2)     | <.0001  | 0.8 (0.04)        | 2.3 (0.1)       | <.0001  | 1.2 (0.1)         | 3.8 (0.1)        | <.0001  |

|                                             |            |            |        |            |            |        |            |            |        |            |            |        |
|---------------------------------------------|------------|------------|--------|------------|------------|--------|------------|------------|--------|------------|------------|--------|
| Delirium & Dementia                         | 2.5 (0.1)  | 13.1 (0.2) | <.0001 | 0.2 (0.1)  | 0.2 (0.1)  | 0.8209 | 0.4 (0.03) | 1.3 (0.1)  | <.0001 | 4.8 (0.1)  | 18.1 (0.2) | <.0001 |
| Anemia                                      | 18.9 (0.4) | 26.2 (0.3) | <.0001 | 9.6 (0.5)  | 13.7 (0.8) | <.0001 | 14.1 (0.4) | 17.7 (0.4) | <.0001 | 25.0 (0.5) | 30.1 (0.3) | <.0001 |
| Malnutrition                                | 2.9 (0.1)  | 6.2 (0.2)  | <.0001 | 1.3 (0.2)  | 2.1 (0.3)  | 0.0041 | 1.9 (0.1)  | 3.7 (0.2)  | <.0001 | 4.1 (0.2)  | 7.4 (0.2)  | <.0001 |
| Paralysis                                   | 0.5 (0.02) | 0.7 (0.03) | <.0001 | 0.4 (0.1)  | 0.6 (0.2)  | 0.1139 | 0.4 (0.02) | 0.7 (0.1)  | <.0001 | 0.6 (0.03) | 0.7 (0.04) | 0.0064 |
| Acute Kidney Injury                         | 10.9 (0.2) | 19.9 (0.3) | <.0001 | 5.0 (0.3)  | 10.0 (0.6) | <.0001 | 7.3 (0.2)  | 14.0 (0.3) | <.0001 | 15.2 (0.3) | 22.7 (0.3) | <.0001 |
| End Stage Renal Disease/Hemodialysis        | 2.8 (0.1)  | 5.2 (0.1)  | <.0001 | 1.8 (0.2)  | 4.3 (0.4)  | <.0001 | 2.5 (0.1)  | 6.7 (0.2)  | <.0001 | 3.3 (0.1)  | 4.7 (0.1)  | <.0001 |
| Chronic kidney disease                      | 11.6 (0.2) | 25.8 (0.3) | <.0001 | 3.2 (0.2)  | 7.9 (0.6)  | <.0001 | 6.0 (0.2)  | 13.8 (0.3) | <.0001 | 18.2 (0.3) | 31.2 (0.3) | <.0001 |
| Fluid/electrolyte disorder                  | 17.9 (0.4) | 26.4 (0.3) | <.0001 | 13.7 (0.5) | 18.3 (0.8) | <.0001 | 15.6 (0.4) | 22.3 (0.4) | <.0001 | 20.7 (0.4) | 28.3 (0.3) | <.0001 |
| <b>Past History</b>                         |            |            |        |            |            |        |            |            |        |            |            |        |
| Prior myocardial infarction                 | 11.4 (0.2) | 14.8 (0.2) | <.0001 | 8.6 (0.4)  | 10.8 (0.6) | 0.0003 | 10.6 (0.2) | 14.6 (0.3) | <.0001 | 12.5 (0.3) | 15.1 (0.3) | <.0001 |
| Prior percutaneous coronary intervention    | 16.2 (0.3) | 15.4 (0.2) | 0.0010 | 12.3 (0.4) | 10.1 (0.7) | 0.1140 | 15.2 (0.3) | 17.3 (0.4) | <.0001 | 17.9 (0.3) | 15.0 (0.3) | <.0001 |
| Prior coronary artery bypass grafting       | 5.1 (0.1)  | 13.7 (0.2) | <.0001 | 1.7 (0.2)  | 2.9 (0.3)  | <.0001 | 3.4 (0.1)  | 10.0 (0.3) | <.0001 | 7.2 (0.2)  | 15.7 (0.2) | <.0001 |
| <b>AMI characteristics/complications</b>    |            |            |        |            |            |        |            |            |        |            |            |        |
| Anterior ST-elevation myocardial infarction | 14.5 (0.2) | 3.2 (0.1)  | <.0001 | 20.8 (0.5) | 4.4 (0.5)  | <.0001 | 16.0 (0.2) | 3.7 (0.2)  | <.0001 | 12.1 (0.2) | 2.9 (0.1)  | <.0001 |
| Cardiogenic shock                           | 5.0 (0.1)  | 2.0 (0.1)  | <.0001 | 3.3 (0.2)  | 1.1 (0.2)  | <.0001 | 4.5 (0.2)  | 2.4 (0.2)  | <.0001 | 5.7 (0.2)  | 2.0 (0.1)  | <.0001 |
| Cardiac arrest                              | 4.5 (0.1)  | 1.5 (0.1)  | <.0001 | 5.4 (0.3)  | 1.8 (0.3)  | <.0001 | 4.9 (0.1)  | 2.3 (0.1)  | <.0001 | 4.0 (0.1)  | 1.3 (0.1)  | <.0001 |
| <b>Procedures</b>                           |            |            |        |            |            |        |            |            |        |            |            |        |
| Mechanical ventilation                      | 6.1 (0.1)  | 6.3 (0.2)  | 0.0970 | 3.7 (0.2)  | 3.0 (0.3)  | 0.1071 | 5.3 (0.1)  | 6.2 (0.2)  | <.0001 | 7.2 (0.2)  | 6.6 (0.2)  | 0.0101 |
| <b>Administrative/ financial details</b>    |            |            |        |            |            |        |            |            |        |            |            |        |
| <u>Payment source</u>                       |            |            | <.0001 |            |            | <.0001 |            |            | <.0001 |            |            | <.0001 |
| Medicare                                    | 48.8 (0.4) | 72.0 (0.3) |        | 7.4 (0.3)  | 11.9 (0.7) |        | 14.4 (0.3) | 25.7 (0.4) |        | 88.7 (0.3) | 92.4 (0.3) |        |
| Medicaid                                    | 6.6 (0.2)  | 5.8 (0.2)  |        | 17.2 (0.6) | 20.0 (0.9) |        | 10.6 (0.4) | 16.6 (0.5) |        | 1.1 (0.1)  | 1.1 (0.1)  |        |
| Private insurance                           | 31.5 (0.4) | 15.2 (0.3) |        | 46.4 (0.7) | 39.8 (1.2) |        | 52.7 (0.6) | 39.2 (0.7) |        | 8.4 (0.3)  | 4.9 (0.2)  |        |
| Others                                      | 13.1 (0.3) | 7.0 (0.2)  |        | 29.0 (0.7) | 28.2 (1.0) |        | 22.2 (0.4) | 18.5 (0.4) |        | 1.8 (0.2)  | 1.6 (0.1)  |        |
| <b>30-day Readmission</b>                   |            |            |        |            |            |        |            |            |        |            |            |        |
| All-cause, %                                | 11.8 (0.1) | 18.8 (0.2) | <.0001 | 8.9 (0.3)  | 11.8 (0.7) | <.0001 | 9.4 (0.2)  | 16.3 (0.3) | <.0001 | 14.5 (0.2) | 20.2 (0.2) | <.0001 |
| Cardiac, %                                  | 6.7 (0.1)  | 10.8 (0.1) | <.0001 | 6.0 (0.3)  | 7.9 (0.7)  | 0.0048 | 5.6 (0.1)  | 10.2 (0.3) | <.0001 | 7.8 (0.1)  | 11.2 (0.2) | <.0001 |
| Unplanned, %                                | 9.2 (0.1)  | 15.1 (0.2) | <.0001 | 6.5 (0.3)  | 9.2 (0.6)  | <.0001 | 7.1 (0.2)  | 11.9 (0.3) | <.0001 | 11.7 (0.2) | 16.6 (0.2) | <.0001 |
| Cardiac Unplanned                           | 4.8 (0.1)  | 7.7 (0.1)  | <.0001 | 4.1 (0.3)  | 5.5 (0.5)  | 0.0078 | 3.9 (0.1)  | 6.4 (0.2)  | <.0001 | 5.7 (0.1)  | 8.3 (0.1)  | <.0001 |

**eTable 6:** Risk-factors for acute myocardial infarction 30-day Readmission in the 3 age groups – 18-44 years, 45-64 years, and ≥65 years.

| Characteristics                       | Age group 18-44 years |         | Age group 45-64 years |         | Age group ≥65 years   |         |
|---------------------------------------|-----------------------|---------|-----------------------|---------|-----------------------|---------|
|                                       | Odds ratio            | P-value | Odds ratio            | P-value | Odds ratio            | P-value |
| Age                                   | 1.00<br>(0.98 – 1.01) | 0.84    | 1.00<br>(0.99 – 1.00) | 0.44    | 1.01<br>(1.01 – 1.01) | <.0001  |
| Women vs. Men                         | 1.19<br>(1.00 – 1.41) | 0.05    | 1.23<br>(1.17 – 1.31) | <.0001  | 1.11<br>(1.08 – 1.15) | <.0001  |
| Income quartiles, Q1 vs. Q4           | 1.27<br>(1.00 – 1.63) | 0.06    | 1.24<br>(1.14 – 1.34) | <.0001  | 1.06<br>(1.00 – 1.12) | 0.06    |
| Income quartiles, Q2 vs. Q4           | 1.13<br>(0.88 – 1.46) | 0.33    | 1.14<br>(1.04-1.24)   | 0.003   | 1.04<br>(0.98 – 1.10) | 0.21    |
| Income quartiles, Q3 vs. Q4           | 1.03<br>(0.79 – 1.35) | 0.81    | 1.11<br>(1.02 – 1.21) | 0.01    | 0.99<br>(0.93 – 1.04) | 0.58    |
| Heart failure                         | 1.66<br>(1.37 – 2.01) | <.0001  | 1.56<br>(1.47 – 1.65) | <.0001  | 1.42<br>(1.37 – 1.47) | <.0001  |
| Chronic atherosclerosis               | 1.27<br>(1.06 – 1.53) | 0.01    | 0.97<br>(0.90 – 1.04) | 0.37    | 0.99<br>(0.95 – 1.04) | 0.77    |
| Cardiac arrhythmia                    | 0.96<br>(0.78 – 1.18) | 0.71    | 1.08<br>(1.02 – 1.15) | 0.01    | 1.12<br>(1.08 – 1.16) | <.0001  |
| Valvular Disease                      | 1.20<br>(0.89 – 1.63) | 0.24    | 1.19<br>(1.09 – 1.31) | 0.0002  | 1.08<br>(1.03 – 1.12) | 0.001   |
| Stroke/transient ischemic attack      | 0.88<br>(0.41 – 1.86) | 0.73    | 1.18<br>(0.93 – 1.50) | 0.16    | 1.11<br>(0.99 – 1.26) | 0.08    |
| Cerebrovascular Disease               | 0.95<br>(0.47 – 1.94) | 0.89    | 1.19<br>(1.06 – 1.32) | 0.003   | 1.08<br>(1.02 – 1.16) | 0.01    |
| Paralysis                             | 2.85<br>(1.30 – 6.25) | 0.01    | 1.32<br>(0.95 – 1.82) | 0.10    | 1.07<br>(0.86 – 1.33) | 0.56    |
| Peripheral Vascular Disease           | 1.19<br>(0.97 – 1.44) | 0.09    | 1.26<br>(1.19 – 1.35) | <.0001  | 1.14<br>(1.10 – 1.18) | <.0001  |
| Diabetes Mellitus                     | 1.42<br>(1.21 – 1.66) | <.0001  | 1.29<br>(1.23 – 1.36) | <.0001  | 1.19<br>(1.15 – 1.24) | <.0001  |
| Acute Kidney Injury                   | 1.25<br>(0.98 – 1.60) | 0.07    | 1.18<br>(1.09 – 1.28) | <.0001  | 1.11<br>(1.06 – 1.16) | <.0001  |
| End State Renal Disease/Hemodialysis  | 2.31<br>(1.70 – 3.15) | <.0001  | 2.35<br>(2.14 – 2.58) | <.0001  | 1.94<br>(1.80 – 2.09) | <.0001  |
| Chronic Kidney Disease                | 1.12<br>(0.81 – 1.55) | 0.49    | 1.52<br>(1.41 – 1.64) | <.0001  | 1.17<br>(1.12 – 1.22) | <.0001  |
| Chronic obstructive pulmonary disease | 1.26<br>(0.94 – 1.70) | 0.13    | 1.39<br>(1.30 – 1.48) | <.0001  | 1.29<br>(1.23 – 1.34) | <.0001  |
| Pneumonia                             | 1.40<br>(0.96 – 2.03) | 0.09    | 1.11<br>(0.99 – 1.24) | 0.07    | 1.07<br>(1.01 – 1.13) | 0.02    |
| Asthma                                | 1.27<br>(0.98 – 1.65) | 0.07    | 1.28<br>(1.16 – 1.42) | <.0001  | 1.10<br>(1.02 – 1.19) | 0.01    |
| Fluid/Electrolyte Disorder            | 1.15<br>(0.94 – 1.41) | 0.17    | 1.12<br>(1.04 – 1.21) | 0.004   | 1.12<br>(1.07 – 1.17) | <.0001  |

|                                             |                       |       |                       |        |                       |        |
|---------------------------------------------|-----------------------|-------|-----------------------|--------|-----------------------|--------|
| Sepsis                                      | 0.83<br>(0.44 – 1.57) | 0.57  | 1.18<br>(0.98 – 1.41) | 0.08   | 1.19<br>(1.2 – 1.32)  | 0.001  |
| Solid Malignancy                            | 1.15<br>(0.71 – 1.88) | 0.57  | 1.17<br>(1.06 – 1.30) | 0.003  | 1.07<br>(1.02 – 1.12) | 0.01   |
| Leukemia/Metastatic Malignancy              | 2.87<br>(1.19 – 6.91) | 0.02  | 1.86<br>(1.41 – 2.46) | <.0001 | 1.46<br>(1.30 – 1.65) | <.0001 |
| Anemia                                      | 1.40<br>(1.13 – 1.75) | 0.003 | 1.21<br>(1.13 – 1.29) | <.0001 | 1.20<br>(1.16 – 1.25) | <.0001 |
| Chronic Skin Ulcer                          | 1.82<br>(0.94 – 3.57) | 0.08  | 1.70<br>(1.43 – 2.02) | <.0001 | 1.38<br>(1.25 – 1.52) | <.0001 |
| Delirium/Dementia                           | 0.84<br>(0.25 – 2.81) | 0.78  | 1.29<br>(0.99 – 1.68) | 0.06   | 0.99<br>(0.93 – 1.04) | 0.62   |
| Malnutrition                                | 1.51<br>(0.98 – 2.32) | 0.06  | 1.10<br>(0.95 – 1.27) | 0.22   | 1.04<br>(0.97 – 1.11) | 0.25   |
| Anterior ST-elevation myocardial infarction | 1.01<br>(0.83 – 1.24) | 0.92  | 1.07<br>(0.99 – 1.16) | 0.08   | 1.14<br>(1.07 – 1.22) | 0.0001 |
| Other ST-elevation myocardial infarction    | 0.93<br>(0.77 – 1.12) | 0.43  | 0.92<br>(0.86 – 0.99) | 0.03   | 0.90<br>(0.84 – 0.96) | 0.001  |
| Prior myocardial infarction                 | 0.94<br>(0.72 – 1.22) | 0.62  | 1.06<br>(0.97 – 1.15) | 0.22   | 1.03<br>(0.98 – 1.09) | 0.19   |
| Prior percutaneous coronary intervention    | 1.12<br>(0.89 – 1.41) | 0.32  | 1.08<br>(1.01 – 1.15) | 0.02   | 1.05<br>(1.01 – 1.10) | 0.02   |
| Prior coronary artery bypass grafting       | 1.61<br>(1.11 – 2.32) | 0.01  | 1.11<br>(1.01 – 1.23) | 0.03   | 1.10<br>(1.04 – 1.16) | 0.001  |

Q1 is lowest and Q4 is highest income quartile.

**eTable 7:** Risk-adjusted odds ratio for gender and income within age-group. There was a significant age-gender and age-income interaction (P<.05).

| <b>30-day readmission<br/>adjusted OR in AMI<sup>#</sup></b> | <b>Age groups</b>  |                    |                     |
|--------------------------------------------------------------|--------------------|--------------------|---------------------|
|                                                              | <b>18-44 years</b> | <b>45-64 years</b> | <b>&gt;65 years</b> |
| <b>Sex</b>                                                   |                    |                    |                     |
| <b>Women vs. Men</b>                                         | 1.24 (1.06, 1.45)  | 1.26 (1.2, 1.33)   | 1.12 (1.08, 1.16)   |
| <b>Income quartile*</b>                                      |                    |                    |                     |
| <b>Q1 vs Q4</b>                                              | 1.32 (1.03, 1.68)  | 1.28 (1.18, 1.39)  | 1.05 (0.99, 1.12)   |
| <b>Q2 vs Q4</b>                                              | 1.18 (0.92, 1.51)  | 1.16 (1.06, 1.26)  | 1.04 (0.98, 1.1)    |
| <b>Q3 vs Q4</b>                                              | 1.07 (0.82, 1.4)   | 1.13 (1.04, 1.22)  | 0.99 (0.93, 1.04)   |

<sup>#</sup> Using risk-adjustment models used for AMI readmissions by CMS.

\*Q1: Lowest – Q4: highest income quartile.

**eTable 8:** Risk-adjusted odds ratio for gender and income within age-group after adjusting for insurance status.. There was a significant age-gender and age-income interaction (P<.05).

| 30-day readmission<br>adjusted OR in AMI <sup>#</sup> | Age groups        |                   |                   |
|-------------------------------------------------------|-------------------|-------------------|-------------------|
|                                                       | 18-44 years       | 45-64 years       | >65 years         |
| <b>Sex</b>                                            |                   |                   |                   |
| <b>Women vs. Men</b>                                  | 1.22 (1.04, 1.43) | 1.26 (1.19, 1.32) | 1.11 (1.08, 1.16) |
| <b>Income quartile*</b>                               |                   |                   |                   |
| <b>Q1 vs Q4</b>                                       | 1.37 (1.07, 1.76) | 1.31 (1.2, 1.42)  | 1.06 (1.00, 1.12) |
| <b>Q2 vs Q4</b>                                       | 1.20 (0.94, 1.54) | 1.18 (1.08, 1.28) | 1.04 (0.98, 1.10) |
| <b>Q3 vs Q4</b>                                       | 1.09 (0.84, 1.42) | 1.14 (1.04, 1.24) | 0.99 (0.93, 1.04) |

<sup>#</sup> Using risk-adjustment models used for AMI readmissions by CMS.

\*Q1: Lowest – Q4: highest income quartile

**eTable 9:** Risk-adjusted odds ratio for gender and income within age-group after adjusting for revascularization status. There was a significant age-gender and age-income interaction (P<.05).

| <b>30-day readmission<br/>adjusted OR in AMI<sup>#</sup></b> | <b>Age groups</b>  |                    |                     |
|--------------------------------------------------------------|--------------------|--------------------|---------------------|
|                                                              | <b>18-44 years</b> | <b>45-64 years</b> | <b>&gt;65 years</b> |
| <b>Sex</b>                                                   |                    |                    |                     |
| <b>Women vs. men</b>                                         | 1.21 (1.03, 1.42)  | 1.24 (1.17, 1.3)   | 1.1 (1.06, 1.14)    |
| <b>Income quartile*</b>                                      |                    |                    |                     |
| <b>Q1 vs Q4</b>                                              | 1.31 (1.02, 1.67)  | 1.28 (1.18, 1.38)  | 1.05 (0.99, 1.11)   |
| <b>Q2 vs Q4</b>                                              | 1.16 (0.91, 1.49)  | 1.16 (1.07, 1.26)  | 1.03 (0.98, 1.1)    |
| <b>Q3 vs Q4</b>                                              | 1.07 (0.82, 1.39)  | 1.12 (1.03, 1.22)  | 0.98 (0.93, 1.04)   |

<sup>#</sup> Using risk-adjustment models used for AMI readmissions by CMS.

\*Q1: Lowest – Q4: highest income quartile
